# Supplementary material for: Recognition of Connective Tissue Disease-Related Interstitial Pneumonia Based on Histological Score—A Validation Study of an Online Diagnostic Decision Support Tool
Source: MDPI journal article supplement (doi:10.3390/diagnostics11081359), 2021-07-28
Supplement: s1 [file s1]

# **Validation study of pathological image analysis to extract autoimmune related groups from Idiopathic pulmonary fibrosis**

Mutsumi Ozasa<sup>1,2</sup>, Yoshiaki Zaizen<sup>1</sup>, Kazuhiro Tabata<sup>1</sup>, Kensuke Kataoka<sup>3</sup>, Shuntaro Sato<sup>4</sup>, Andrey Bychkov<sup>1,5</sup>, Noriho Sakamoto<sup>2</sup>, Hiroshi Mukae<sup>2</sup>, Yasuhiro Kondoh<sup>3</sup>, Junya Fukuoka<sup>1,5\*</sup>

<sup>1</sup>Department of Pathology, Nagasaki University Graduate School of Biomedical Sciences

<sup>2</sup>Department of Respiratory Medicine, Nagasaki University Graduate School of Biomedical Sciences

<sup>3</sup>Department of Respiratory Medicine and Allergy, Tosei General Hospital

<sup>4</sup>Clinical Research Center, Nagasaki University Hospital

<sup>5</sup>Department of Pathology, Kameda Medical Center

\*Corresponding author

Junya Fukuoka, MD, PhD

Department of Pathology, Nagasaki University Graduate School of Biomedical Sciences, Sakamoto, 852-8501, Japan

**Table S1.** Patient's distribution with diagnostic results for each evaluator.

| Observer A              |           |           |         | Observer B              |           |          |         |
|-------------------------|-----------|-----------|---------|-------------------------|-----------|----------|---------|
| Variable                | CTD       | IPF       | P-value | Variable                | CTD       | IPF      | P-value |
| Sex                     |           |           | <0.01   | Sex                     |           |          | 0.03    |
| Female                  | 21        | 10        |         | Female                  | 15        | 16       |         |
| Male                    | 10        | 53        |         | Male                    | 6         | 57       |         |
| Smoking history         |           |           | <0.01   | Smoking history         |           |          | <0.01   |
| Ex                      | 8         | 49        |         | Ex                      | 5         | 52       |         |
| Never                   | 23        | 14        |         | Never                   | 16        | 21       |         |
| CTD symptom             |           |           | <0.01   | CTD symptom             |           |          | 0.02    |
| positive                | 19        | 18        |         | Positive                | 13        | 24       |         |
| negative                | 12        | 45        |         | Negative                | 8         | 49       |         |
| Autoantibody            |           |           | <0.01   | Autoantibody            |           |          | <0.01   |
| positive                | 23        | 27        |         | positive                | 17        | 33       |         |
| negative                | 8         | 36        |         | negative                | 4         | 40       |         |
| IPAF serological domain |           |           | <0.01   | IPAF serological domain |           |          | 0.03    |
| positive                | 19        | 8         |         | positive                | 14        | 13       |         |
| negative                | 12        | 55        |         | negative                | 7         | 60       |         |
| CD4/8                   | 1.61±1.38 | 3.09±2.45 | <0.01   | CD4/8                   | 1.55±1.26 | 2.9±2.39 | 0.01    |

  

| Observer C              |           |           |         | Observer D              |           |           |         |
|-------------------------|-----------|-----------|---------|-------------------------|-----------|-----------|---------|
| Variable                | CTD       | IPF       | P-value | Variable                | CTD       | IPF       | P-value |
| Sex                     |           |           | <0.01   | Sex                     |           |           | <0.01   |
| Female                  | 16        | 15        |         | Female                  | 18        | 13        |         |
| Male                    | 9         | 54        |         | Male                    | 6         | 57        |         |
| Smoking history         |           |           | <0.01   | Smoking history         |           |           | 0.01    |
| Ex                      | 7         | 50        |         | Ex                      | 5         | 52        |         |
| Never                   | 18        | 19        |         | Never                   | 19        | 18        |         |
| CTD symptom             |           |           |         | CTD symptom             |           |           | <0.01   |
| positive                | 14        | 23        | 0.05    | positive                | 16        | 21        |         |
| negative                | 11        | 46        |         | negative                | 8         | 49        |         |
| Autoantibody            |           |           | <0.01   | Autoantibody            |           |           | <0.01   |
| positive                | 19        | 31        |         | positive                | 19        | 31        |         |
| negative                | 6         | 38        |         | negative                | 5         | 39        |         |
| IPAF serological domain |           |           | <0.01   | IPAF serological domain |           |           | 0.02    |
| positive                | 13        | 14        |         | positive                | 16        | 11        |         |
| negative                | 12        | 55        |         | negative                | 8         | 59        |         |
| CD4/8                   | 1.61±1.36 | 2.96±2.41 | 0.01    | CD4/8                   | 1.52±1.37 | 2.97±2.38 | <0.01   |
